# Supplementary material for: Ascorbic acid–induced TET activation mitigates adverse hydroxymethylcytosine loss in renal cell carcinoma
Source: JCI journal article supplement (doi:10.1172/jci98747), 2019-01-31
Supplement: sd1 [file 1]

**Table 1:** Summary of clinical and pathologic features and 5hmC expression

| <b>Feature</b>              | <b>Median (IQR)</b> |
|-----------------------------|---------------------|
| Age at surgery in years     | 61 (53-69)          |
| Charlson score              | 1 (0-2)             |
| Tumor size in cm            | 5.0 (3.0-8.5)       |
| SSIGN score                 | 2 (0-6)             |
| Percent positive 5hmC       | 90 (40-100)         |
| <b>Sex</b>                  | <b>N (%)</b>        |
| Female                      | 216 (38)            |
| Male                        | 360 (62)            |
| Symptoms                    | 254 (44)            |
| Constitutional symptoms     | 100 (17)            |
| ECOG performance status     |                     |
| 0                           | 479 (83)            |
| 1                           | 59 (10)             |
| 2                           | 27 (5)              |
| 3                           | 11 (2)              |
| 2010 pT                     |                     |
| pT1a                        | 220 (38)            |
| pT1b                        | 117 (20)            |
| pT2a                        | 45 (8)              |
| pT2b                        | 14 (2)              |
| pT3a                        | 143 (25)            |
| pT3b                        | 27 (5)              |
| pT3c                        | 3 (1)               |
| pT4                         | 7 (1)               |
| 2010 pN                     |                     |
| pNX/0                       | 547 (95)            |
| pN1                         | 29 (5)              |
| 2010 M                      |                     |
| M0                          | 525 (91)            |
| M1                          | 51 (9)              |
| Grade                       |                     |
| 1                           | 47 (8)              |
| 2                           | 241 (42)            |
| 3                           | 206 (36)            |
| 4                           | 82 (14)             |
| Coagulative tumor necrosis  | 147 (26)            |
| Sarcomatoid differentiation | 22 (4)              |
| 5hmC intensity              |                     |
| Absent                      | 12 (2)              |
| Mild                        | 105 (18)            |
| Moderate                    | 152 (26)            |
| Marked                      | 307 (53)            |

**Table 2:** Associations of percent positive 5hmC with clinical and pathologic features

| <b>Feature</b>                     | <b>Correlation*</b>             | <b>P-value</b> |
|------------------------------------|---------------------------------|----------------|
| Age at surgery in years            | -0.07                           | 0.092          |
| Charlson score                     | -0.12                           | 0.004          |
| Tumor size in cm                   | -0.52                           | <0.001         |
| SSIGN score                        | -0.61                           | <0.001         |
| <b>Sex</b>                         | <b>Median (IQR)<sup>†</sup></b> |                |
| Female                             | 90 (50-100)                     | 0.016          |
| Male                               | 80 (30-100)                     |                |
| <b>Symptoms</b>                    |                                 |                |
| No                                 | 90 (70-100)                     | <0.001         |
| Yes                                | 60 (10-90)                      |                |
| <b>Constitutional symptoms</b>     |                                 |                |
| No                                 | 90 (50-100)                     | <0.001         |
| Yes                                | 30 (5-80)                       |                |
| <b>ECOG performance status</b>     |                                 |                |
| 0                                  | 90 (50-100)                     | 0.006          |
| ≥1                                 | 70 (10-100)                     |                |
| <b>2010 pT</b>                     |                                 |                |
| pT1a                               | 100 (80-100)                    | <0.001         |
| pT1b                               | 90 (70-100)                     |                |
| pT2a                               | 80 (50-100)                     |                |
| pT2b                               | 55 (20-80)                      |                |
| pT3a                               | 50 (10-90)                      |                |
| pT3b                               | 10 (5-50)                       |                |
| pT3c                               | 10 (0-80)                       |                |
| pT4                                | 5 (5-10)                        |                |
| <b>2010 pN</b>                     |                                 |                |
| pNX/0                              | 90 (50-100)                     | <0.001         |
| pN1                                | 10 (5-50)                       |                |
| <b>2010 M</b>                      |                                 |                |
| M0                                 | 90 (50-100)                     | <0.001         |
| M1                                 | 20 (5-70)                       |                |
| <b>Grade</b>                       |                                 |                |
| 1                                  | 100 (95-100)                    | <0.001         |
| 2                                  | 100 (80-100)                    |                |
| 3                                  | 60 (30-90)                      |                |
| 4                                  | 10 (5-50)                       |                |
| <b>Coagulative tumor necrosis</b>  |                                 |                |
| No                                 | 90 (70-100)                     | <0.001         |
| Yes                                | 20 (5-60)                       |                |
| <b>Sarcomatoid differentiation</b> |                                 |                |
| No                                 | 90 (50-100)                     | <0.001         |

|                |              |        |
|----------------|--------------|--------|
| Yes            | 10 (5-30)    |        |
| 5hmC intensity |              |        |
| Absent         | 0 (0-0)      | <0.001 |
| Mild           | 10 (5-30)    |        |
| Moderate       | 55 (35-80)   |        |
| Marked         | 100 (90-100) |        |

\*Spearman rank correlation coefficient.

†Median (IQR) percent positive 5hmC.

**Table 3:** Associations of 5hmC intensity with clinical and pathologic features

| Feature                     | 5hmC Intensity      |                |                   |                 | P-value |
|-----------------------------|---------------------|----------------|-------------------|-----------------|---------|
|                             | Absent<br>N=12      | Mild<br>N=105  | Moderate<br>N=152 | Marked<br>N=307 |         |
|                             | <i>Median (IQR)</i> |                |                   |                 |         |
| Age at surgery in years     | 58 (51-71)          | 62 (54-70)     | 64 (55-70)        | 60 (51-68)      | 0.004   |
| Charlson score              | 5 (0-6)             | 1 (0-3)        | 1 (0-2)           | 1 (0-2)         | 0.005   |
| Tumor size in cm            | 11.1 (8.5-16.8)     | 9.4 (6.5-12.0) | 6.2 (4.0-8.9)     | 3.6 (2.3-5.5)   | <0.001  |
| SSIGN score                 | 10 (8-13)           | 7 (5-9)        | 3 (1-7)           | 0 (0-2)         | <0.001  |
| Percent positive 5hmC       | 0 (0-0)             | 10 (5-30)      | 55 (35-80)        | 100 (90-100)    | <0.001  |
| Sex                         | <i>N (%)</i>        |                |                   |                 |         |
| Female                      | 3 (25)              | 34 (32)        | 50 (33)           | 129 (42)        | 0.018   |
| Male                        | 9 (75)              | 71 (68)        | 102 (67)          | 178 (58)        |         |
| Symptoms                    | 12 (100)            | 75 (71)        | 74 (49)           | 93 (30)         | <0.001  |
| Constitutional symptoms     | 5 (42)              | 40 (38)        | 28 (18)           | 27 (9)          | <0.001  |
| ECOG performance status     |                     |                |                   |                 | 0.051   |
| 0                           | 11 (92)             | 79 (75)        | 126 (83)          | 263 (86)        |         |
| ≥1                          | 1 (8)               | 26 (25)        | 26 (17)           | 44 (14)         |         |
| 2010 pT                     |                     |                |                   |                 | <0.001  |
| pT1a                        | 0                   | 13 (12)        | 38 (25)           | 169 (55)        |         |
| pT1b                        | 1 (8)               | 7 (7)          | 37 (24)           | 72 (23)         |         |
| pT2a                        | 0                   | 7 (7)          | 16 (11)           | 22 (7)          |         |
| pT2b                        | 2 (17)              | 3 (3)          | 4 (3)             | 5 (2)           |         |
| pT3a                        | 7 (58)              | 48 (46)        | 51 (34)           | 37 (12)         |         |
| pT3b                        | 1 (8)               | 20 (19)        | 5 (3)             | 1 (<1)          |         |
| pT3c                        | 1 (8)               | 1 (1)          | 1 (1)             | 0               |         |
| pT4                         | 0                   | 6 (6)          | 0                 | 1 (<1)          |         |
| 2010 pN                     |                     |                |                   |                 |         |
| pNX/0                       | 9 (75)              | 89 (85)        | 147 (97)          | 302 (98)        |         |
| pN1                         | 3 (25)              | 16 (15)        | 5 (3)             | 5 (2)           |         |
| 2010 M                      |                     |                |                   |                 | <0.001  |
| M0                          | 6 (50)              | 86 (82)        | 134 (88)          | 299 (97)        |         |
| M1                          | 6 (50)              | 19 (18)        | 18 (12)           | 8 (3)           |         |
| Grade                       |                     |                |                   |                 | <0.001  |
| 1                           | 0                   | 0              | 1 (1)             | 46 (15)         |         |
| 2                           | 1 (8)               | 5 (5)          | 44 (29)           | 191 (62)        |         |
| 3                           | 5 (42)              | 53 (50)        | 89 (59)           | 59 (19)         |         |
| 4                           | 6 (50)              | 47 (45)        | 18 (12)           | 11 (4)          |         |
| Coagulative tumor necrosis  | 10 (83)             | 68 (65)        | 50 (33)           | 19 (6)          | <0.001  |
| Sarcomatoid differentiation | 1 (8)               | 14 (13)        | 3 (2)             | 4 (1)           | <0.001  |

**Table 4:** Associations of 5hmC expression with patient outcomes

| Feature                              | Univariable         |         | Multivariable*    |         |
|--------------------------------------|---------------------|---------|-------------------|---------|
|                                      | HR (95% CI)         | P-value | HR (95% CI)       | P-value |
| <i>Death from Any Cause</i>          |                     |         |                   |         |
| Percent positive 5hmC <sup>†</sup>   | 0.82 (0.79-0.85)    | <0.001  | 0.97 (0.93-1.02)  | 0.22    |
| 5hmC intensity                       |                     |         |                   |         |
| Absent                               | 11.60 (6.19-21.76)  | <0.001  | 1.49 (0.73-3.06)  | 0.27    |
| Mild                                 | 4.44 (3.12-6.31)    | <0.001  | 0.96 (0.62-1.46)  | 0.83    |
| Moderate                             | 1.69 (1.15-2.46)    | 0.007   | 0.73 (0.49-1.10)  | 0.13    |
| Marked                               | 1.0 (reference)     |         | 1.0 (reference)   |         |
| <i>Death from RCC</i>                |                     |         |                   |         |
| Percent positive 5hmC <sup>†</sup>   | 0.74 (0.70-0.78)    | <0.001  | 0.93 (0.87-0.98)  | 0.013   |
| 5hmC intensity                       |                     |         |                   |         |
| Absent                               | 27.27 (12.49-59.52) | <0.001  | 1.49 (0.61-3.63)  | 0.38    |
| Mild                                 | 11.15 (6.50-19.13)  | <0.001  | 1.52 (0.83-2.80)  | 0.18    |
| Moderate                             | 4.06 (2.29-7.19)    | <0.001  | 1.25 (0.68-2.27)  | 0.48    |
| Marked                               | 1.0 (reference)     |         | 1.0 (reference)   |         |
| <i>Progression among M0 Patients</i> |                     |         |                   |         |
| Percent positive 5hmC <sup>†</sup>   | 0.76 (0.72-0.80)    | <0.001  | 0.91 (0.86-0.97)  | 0.002   |
| 5hmC intensity                       |                     |         |                   |         |
| Absent                               | 27.07 (11.06-66.24) | <0.001  | 4.69 (1.84-11.96) | 0.001   |
| Mild                                 | 8.44 (5.25-13.56)   | <0.001  | 1.43 (0.80-2.55)  | 0.23    |
| Moderate                             | 3.23 (1.98-5.27)    | <0.001  | 1.23 (0.72-2.08)  | 0.45    |
| Marked                               | 1.0 (reference)     |         | 1.0 (reference)   |         |

\*Adjusted for age, sex, and SSIGN score for time to death from any cause and time to death from RCC. Adjusted for age, sex, and progression score for time to progression among M0 patients.

<sup>†</sup>HR and CI represent a 10% increase.

SUPPLEMENTAL FIGURES:

Fig S1: AA induced increase in 5hmC is TET dependent (ccRCC cell line 786-O)

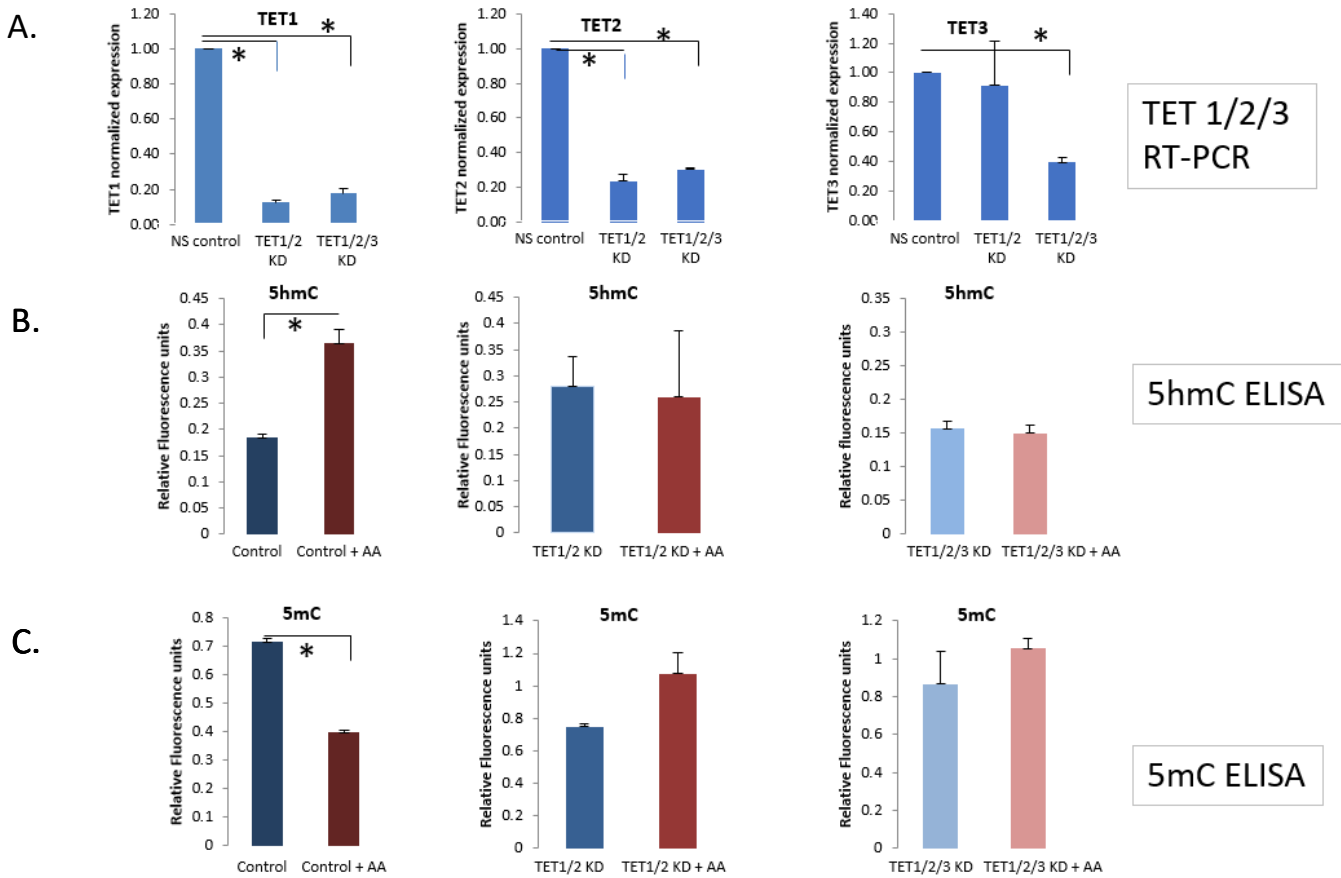

**Fig 1. Panel A.** RCC cells (786O) were transfected with siRNAs against TET1/2/3 and non-silencing control. RT-PCR of TET 1, TET2, TET3 after TET1/2 KD and TET 1/2/3 KD in ccRCC cell line 786-O shows specific knockdown as compared to controls (TTest, P Value<0.05). **Panel B.** ELISA for 5mC reveals a decrease in 5mC in 786-O after treatment with AA (t test p<0.05), but no change in 5mC in TET 1/2 KD 786-O and TET 1/2/3 KD 786-O after AA treatment. **Panel C.** 5hmC ELISA revealing an increase in 5hmC in 786-O after AA treatment (t test p<0.05), but no increase in 5hmC in TET 1/2 KD 786-O and TET 1/2/3 KD 786-O after AA treatment.

**Fig S2: Oxidative bisulphite sequencing of ccRCC cell lines after AA treatment reveals increase in 5hmC in the gene loci encoding putative tumor suppressors such as NBPF1, AKT3, CWH43, KMT2C and AKT3**

**A. NBPF1**

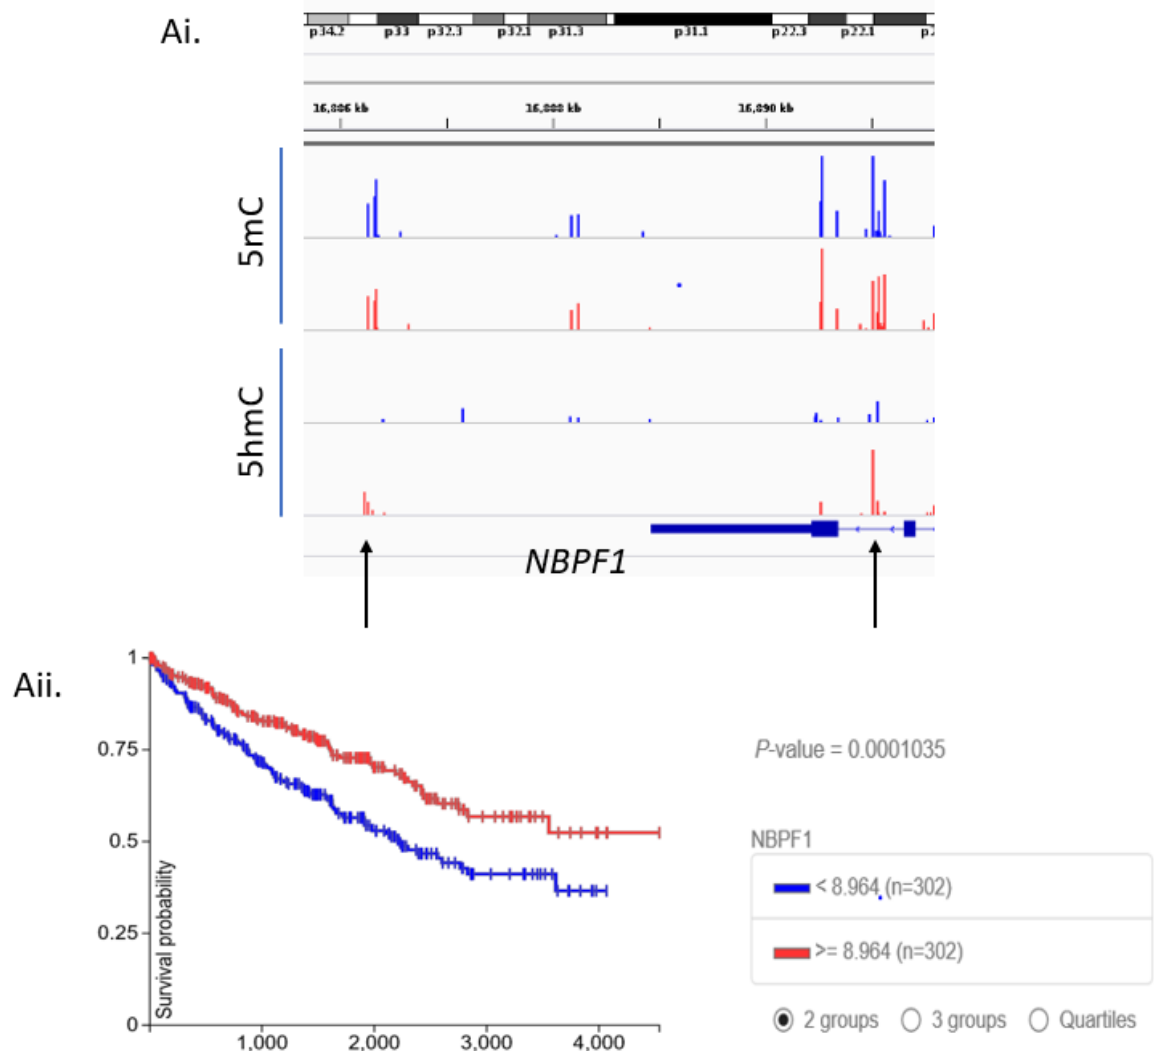

**Fig S2A. Ai :** OxBS revealing decrease in 5mC and increase in 5hmC in loci within the promoter of the NBPF1 gene. **Aii :** TCGA data (n=604) revealing worse prognosis in ccRCC patients with a lower tumor expression of NBPF1 (p<0.001)

## B. AKT3

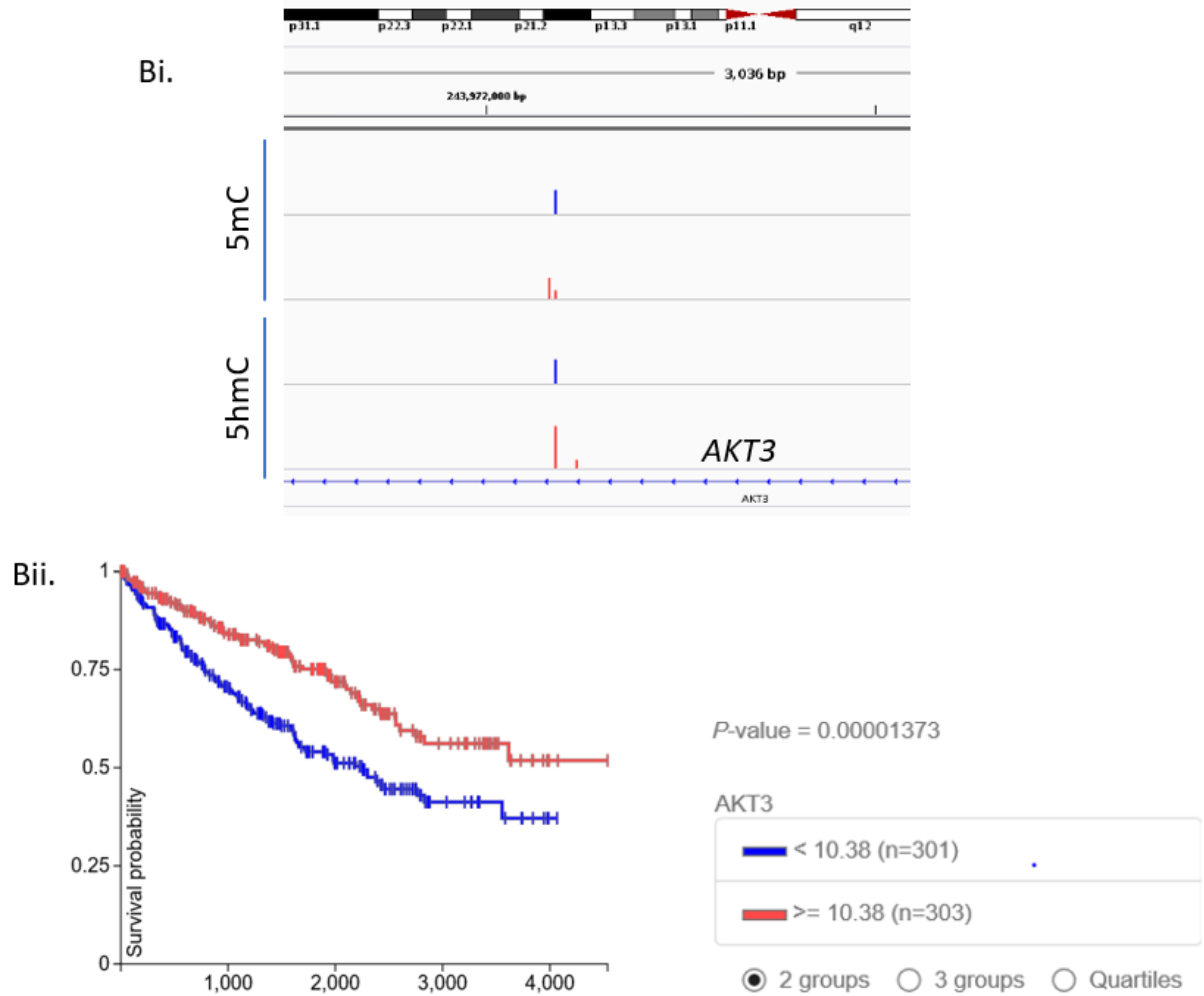

**Fig S2B. Bi** : OxBS revealing decrease in 5mC and increase in 5hmC in a locus within the promoter of the AKT3 gene. **Bii** : TCGA data (n=604) revealing worse prognosis in ccRCC patients with a lower tumor expression of AKT3 ( $p < 0.001$ ).



### C. DOCK8

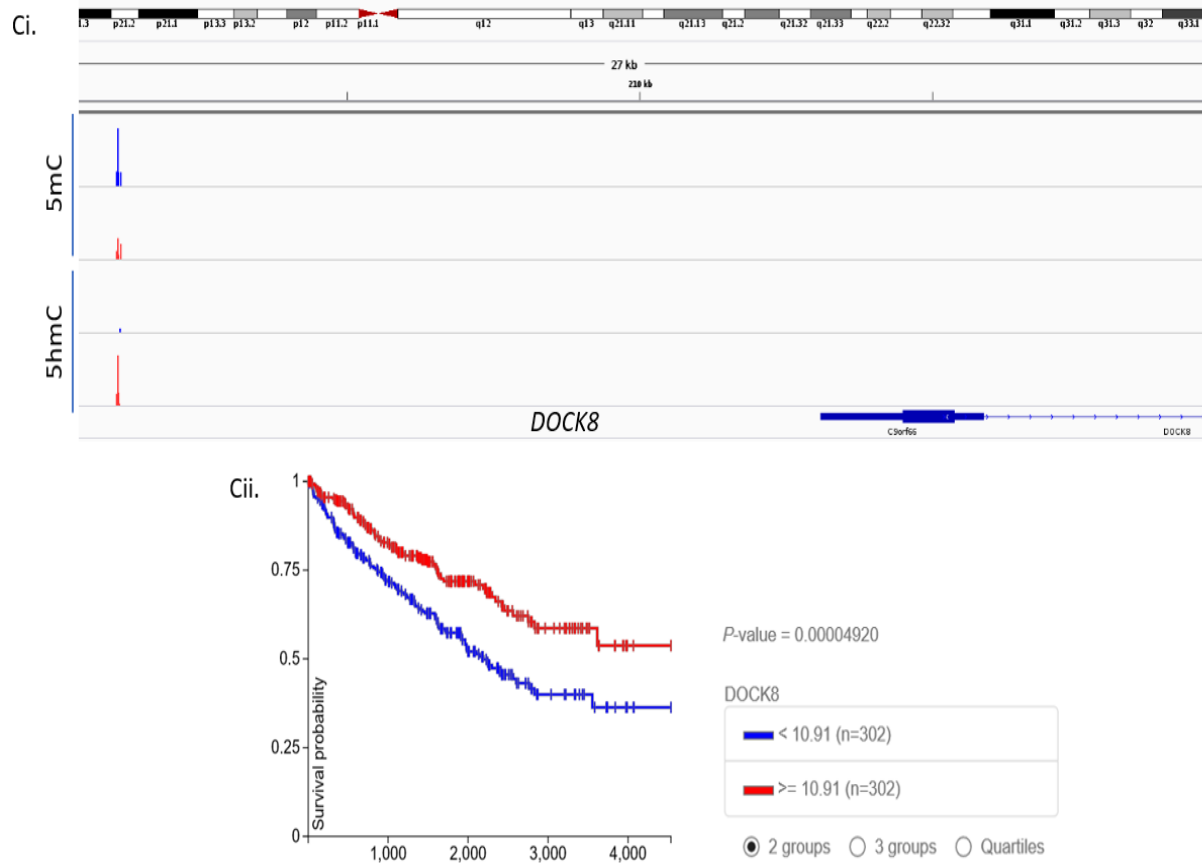

**Fig S2C.** Ci : OxBS revealing decrease in 5mC and increase in 5hmC in a locus within the promoter of the DOCK8 gene. Cii : TCGA data (n=604) revealing worse prognosis in ccRCC patients with a lower tumor expression of DOCK8 ( $p < 0.001$ ).

## D. KMT2C (MLL3)

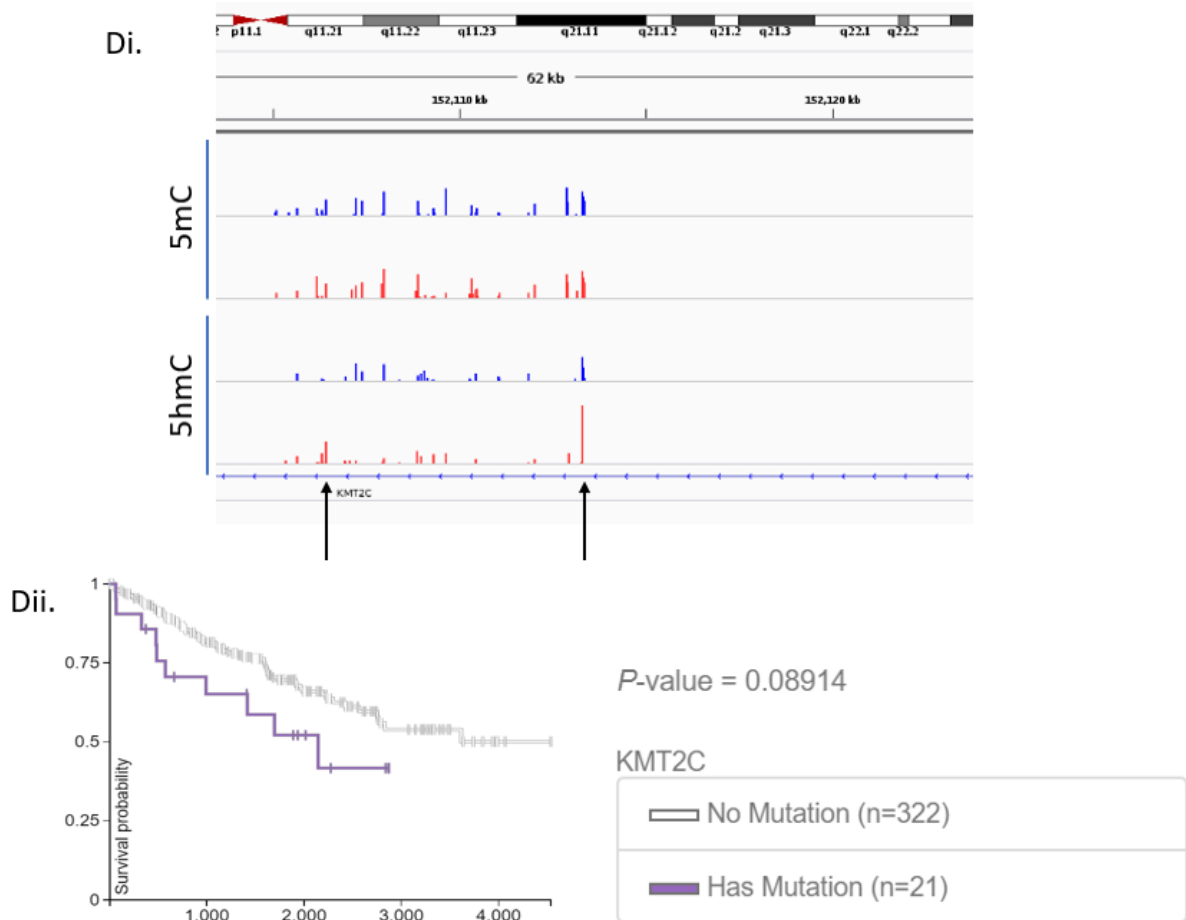

**Fig S2D. Di :** OxBS revealing decrease in 5mC and increase in 5hmC in loci within the KMT2C gene. **Dii :** TCGA data (n=604) revealing a trend towards worse prognosis in ccRCC patients with a mutation of KMT2C (p=0.08).

**Fig S3: *SMAD6* expression increases with AA treatment in ccRCC cell lines.** RCC cells were treated with AA (1mM) for 6 hrs and then incubated for 24 hrs with fresh media. RNA was isolated and *SMAD6* expression was assessed by qRTPCR.

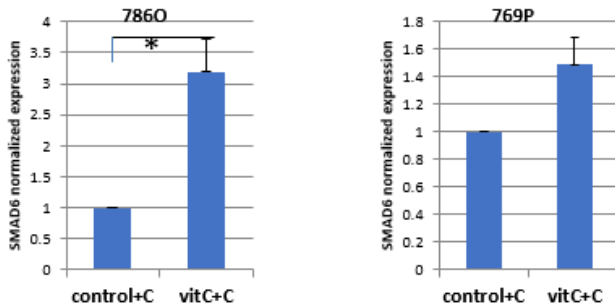

**Fig S4: Acute cytotoxicity with high dose ascorbic acid (millimolar concentration) reversed with catalase**

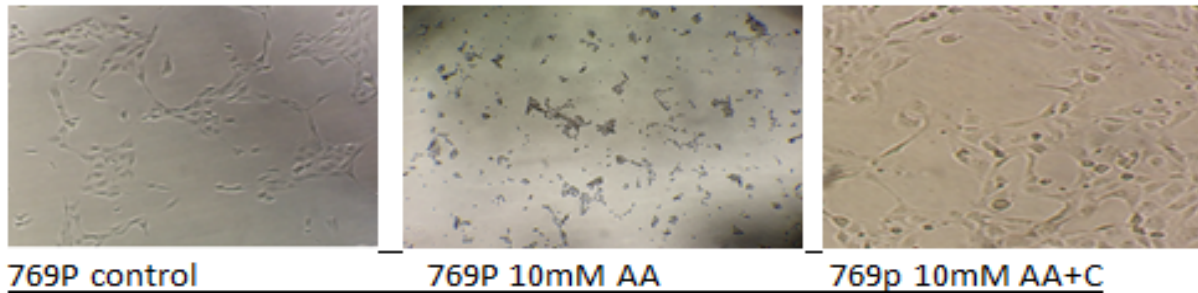

**Fig S5: A: High dose AA short term exposure (4 hours) in ccRCC cell line 786O, with or without catalase, followed by 24 hour incubation in fresh media.** Results similar to 769P (shown in Fig. 6A)

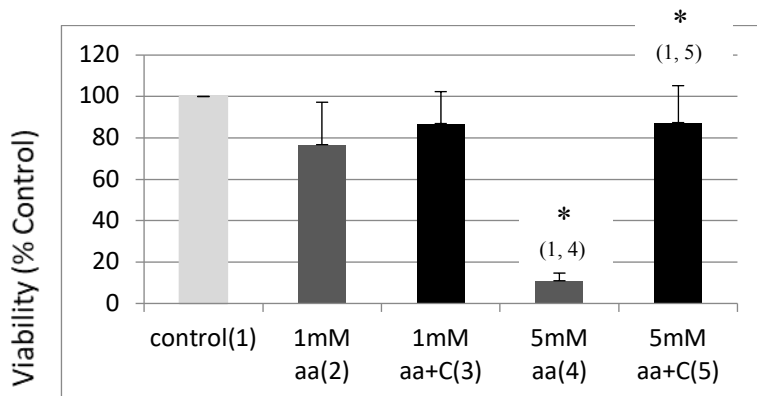

**B: ccRCC cell line 786-O viability with lower doses of AA (50uM, 200uM, 500uM), with catalase. Inhibition seen with 500uM at 72hr (74% viability, p<0.001) .**

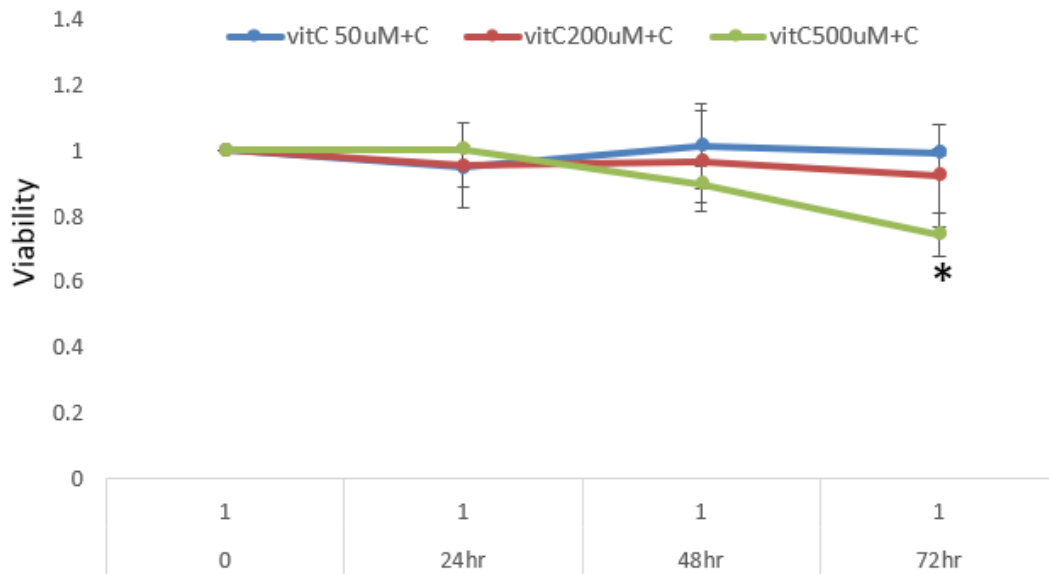

**Fig S6: Immunohistochemistry representative pictures in ccRCC (L2HGDH, TET-2 and 5hmC staining- each figure represents a different case)**

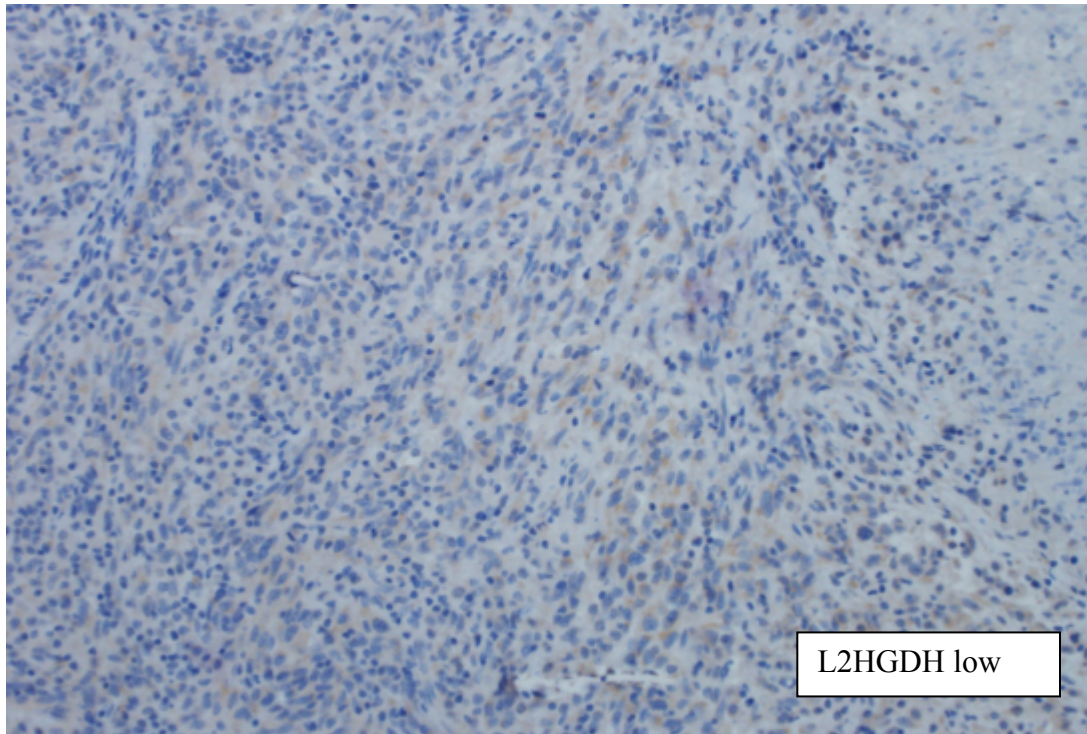

ccRCC 07-3721  
10x

L2HGDH low



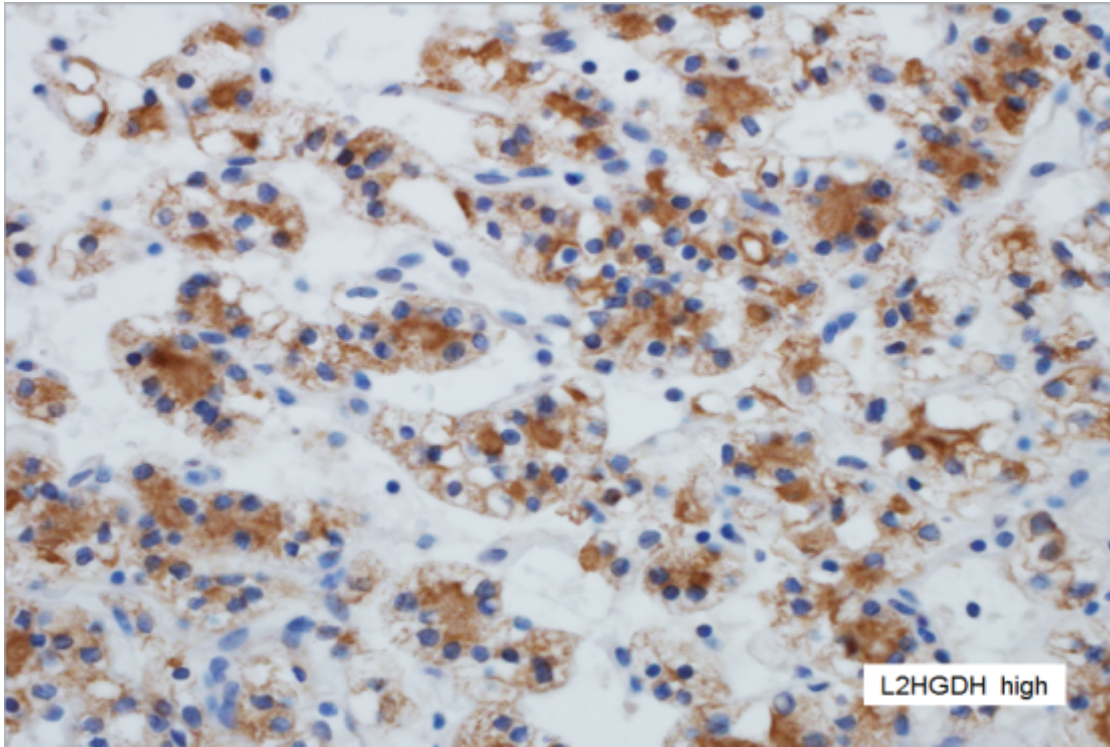

ccRCC 07-  
10593  
20x

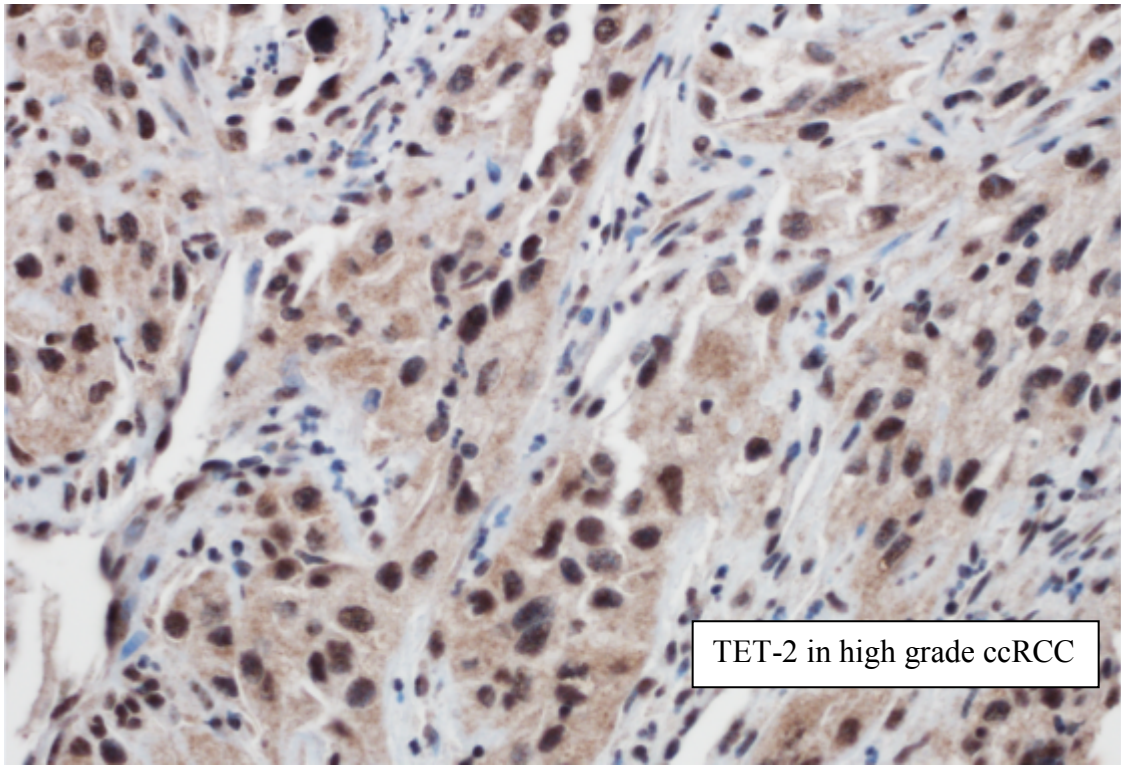

ccRCC 07-6401  
20x

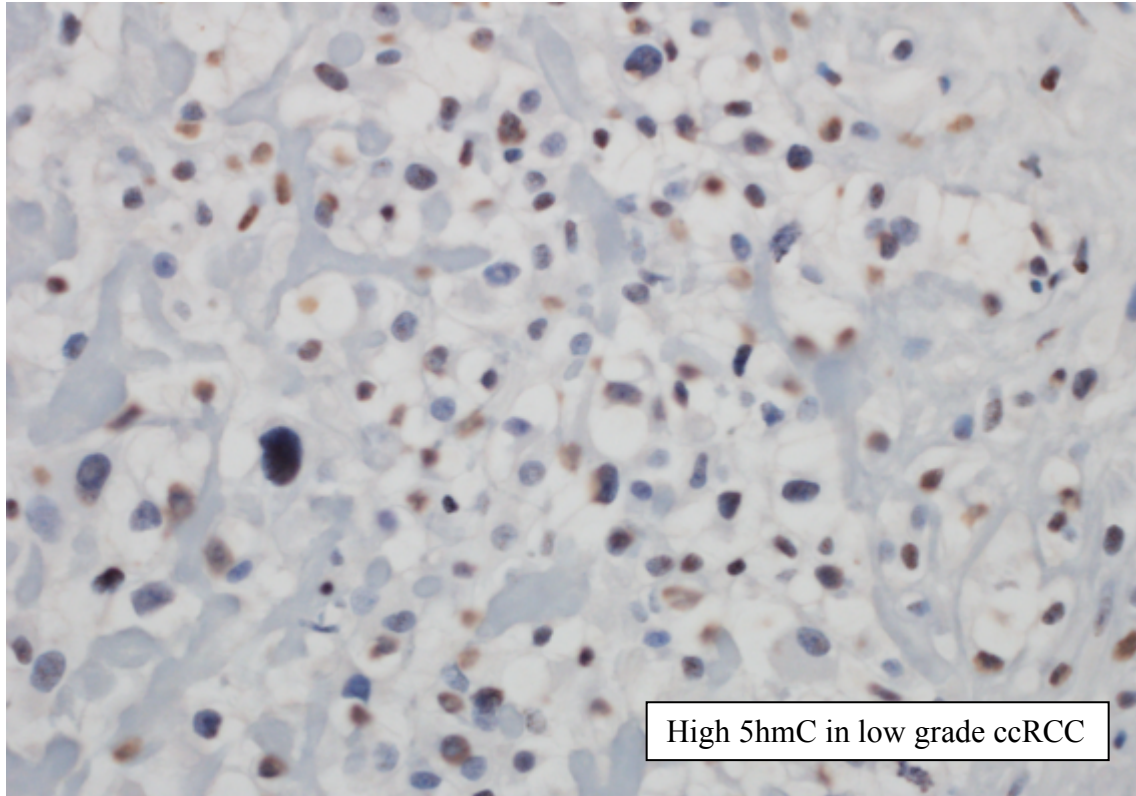

ccRCC 08-1651  
20x

High 5hmC in low grade ccRCC

**Fig S7: High dose IV AA treatment of ccRCC xenografts leads to reduced grade (improved differentiation) and increased intra-tumoral 5hmC levels**

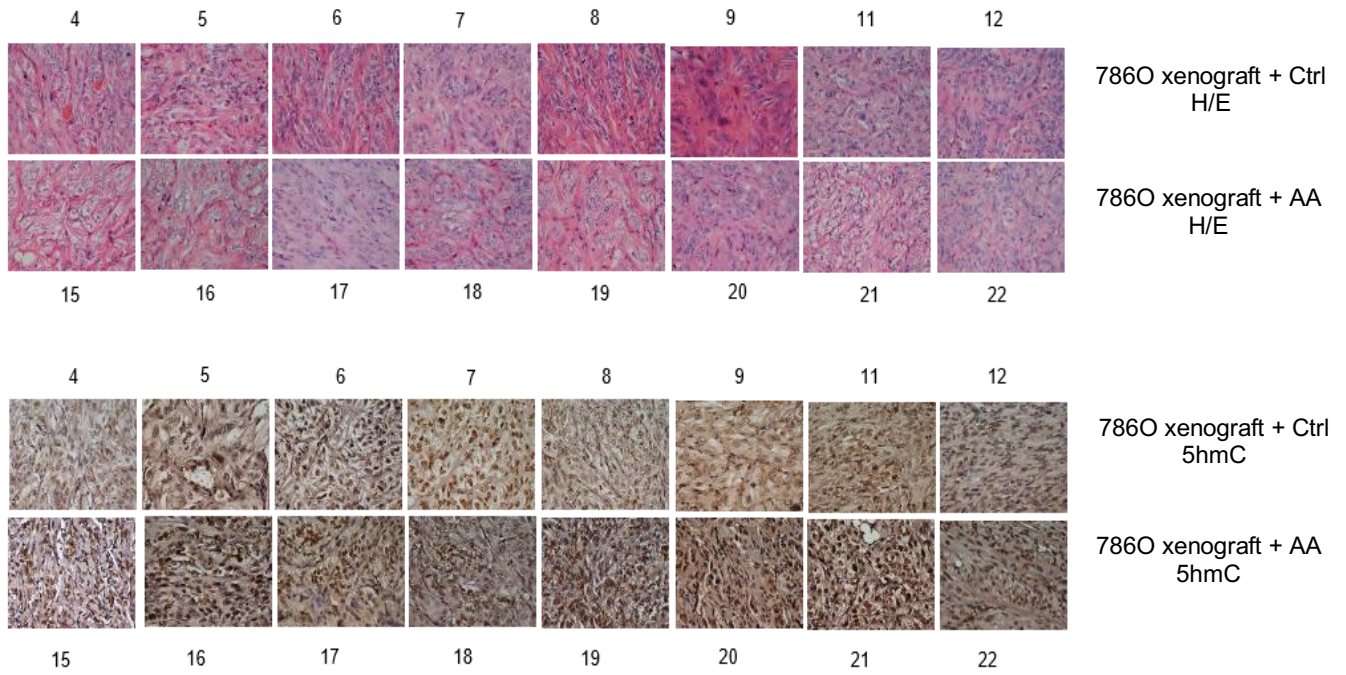

**A:** Histologic examination showing the Hematoxylin Eosin comparison of ccRCC xenograft control group vs IV AA treated group at 400x magnification. Tumor cells in the control group showed a higher grade (poorly differentiated) based on increased prominent hyperchromatic nucleoli, nuclear pleomorphism, multilobation and multinucleate giant cells when compared to the IV AA treated group.

**B:** Immunohistochemical staining of 5-Hydroxymethylcytosine (5-hmC) comparison of ccRCC xenograft control group vs IV AA treated group at 400x magnification. Tumor cells in the control group showed a lesser intensity and decreased staining of nuclei with 5-hmC when compared to the IV AA treated group.
